# Supplementary material
Source: MDPI journal article supplement (https://www.mdpi.com/2073-4441/15/10/1845)
Supplement: s1 [file s1]

# Fish tissue contamination with organic pollutants and heavy metals: Link between land use and ecological health

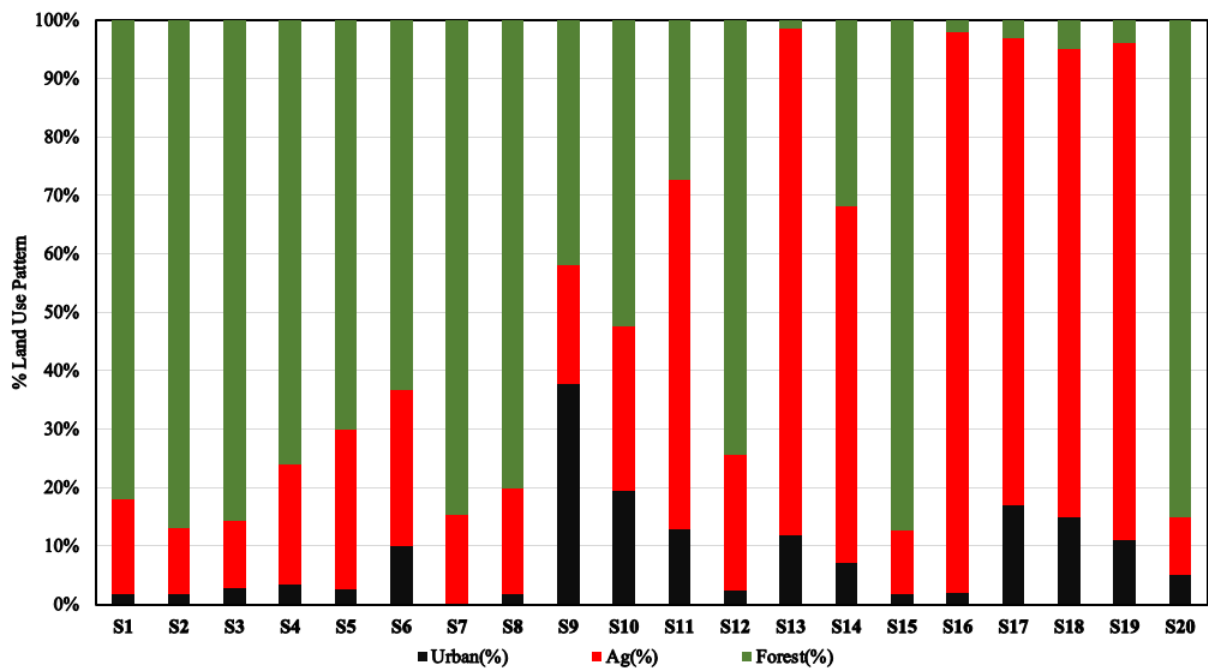

Supplementary Figure S1. Variations in land use pattern in different sites of Geum River during the study period

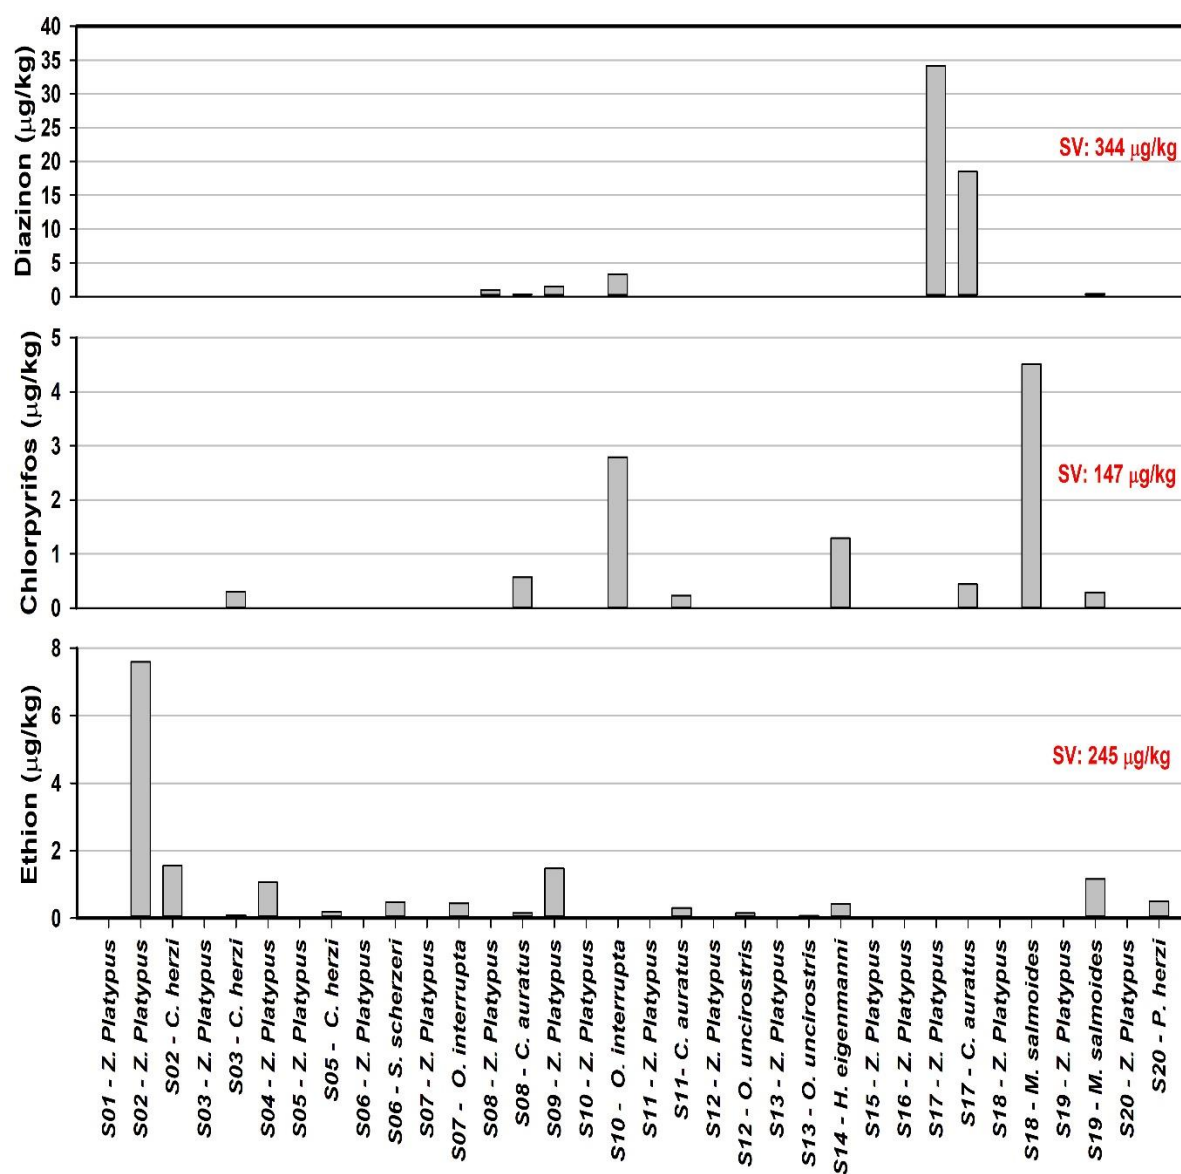

Supplementary Figure S2. Organic phosphorus pesticides (OPPs) at different sites in different fish species (SV: screen value)

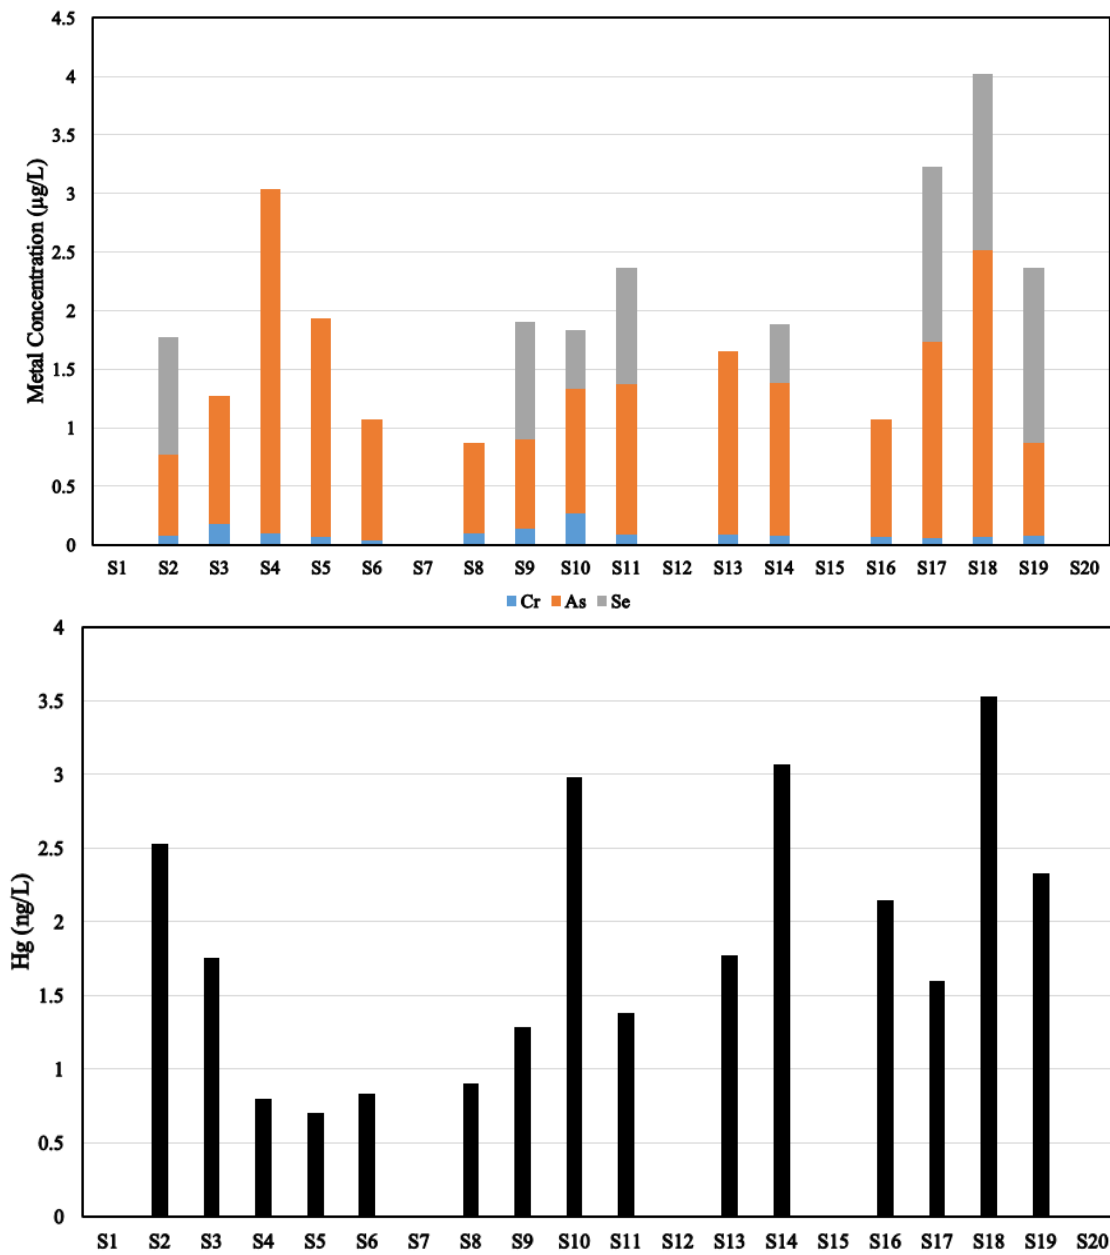

Supplementary Figure S3. Variations in metal concentration of surface water in different sites of Geum River

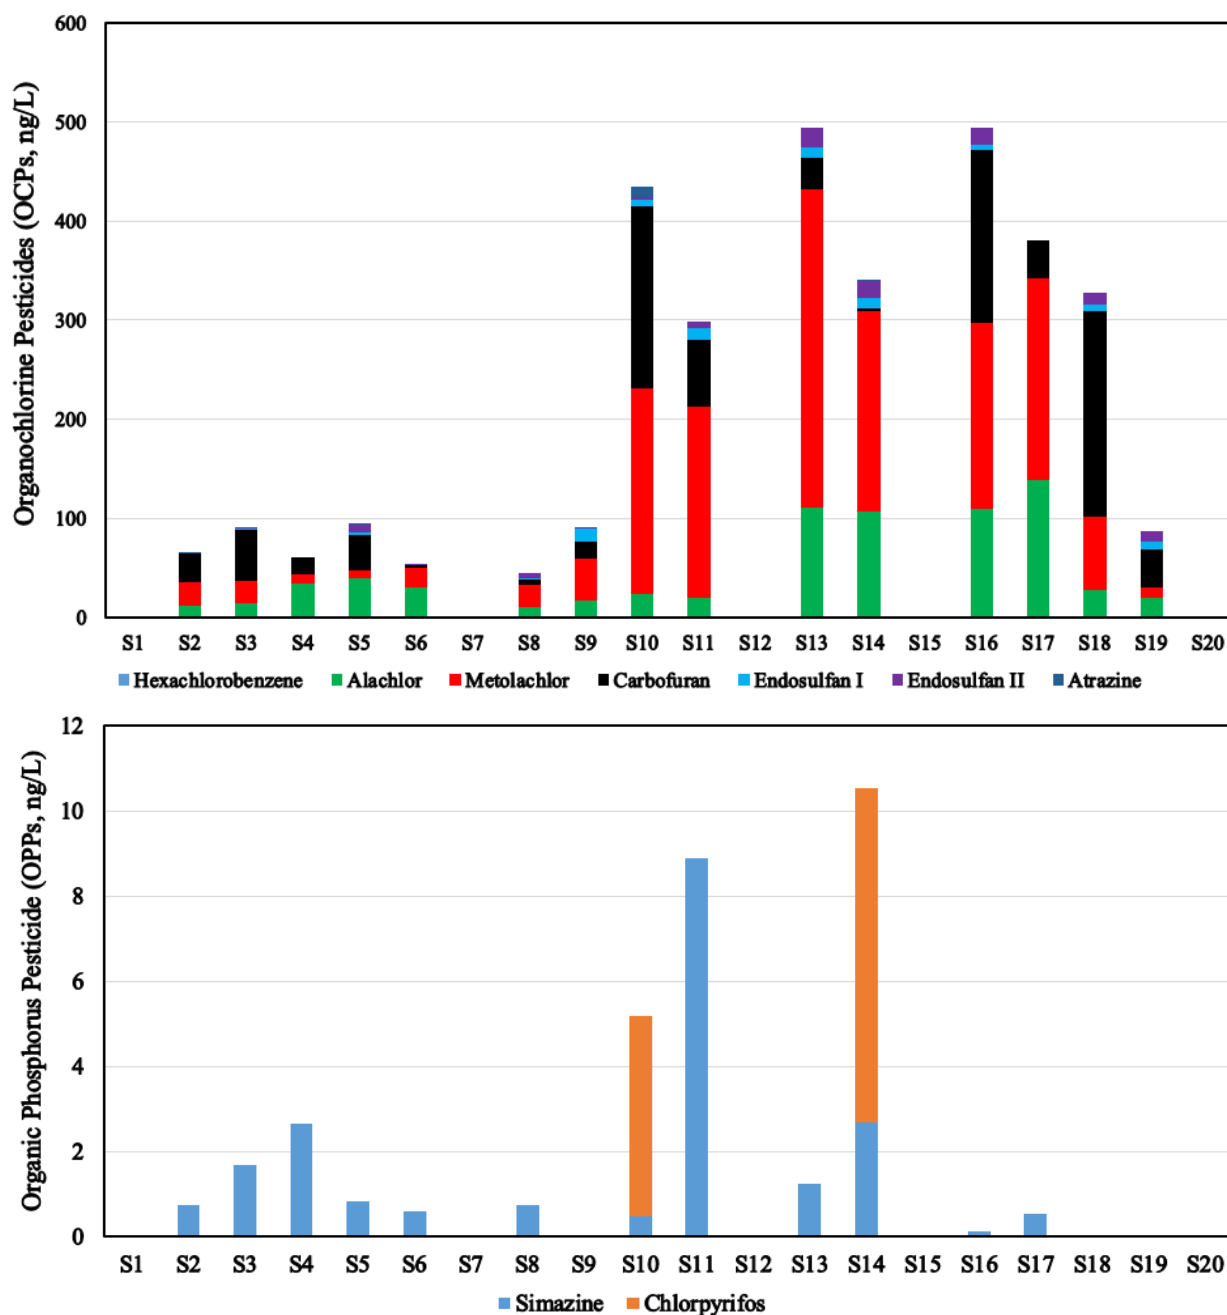

Supplementary Figure S4. Variations in organochlorine and organic phosphorus pesticides of surface water in different sites of Geum River

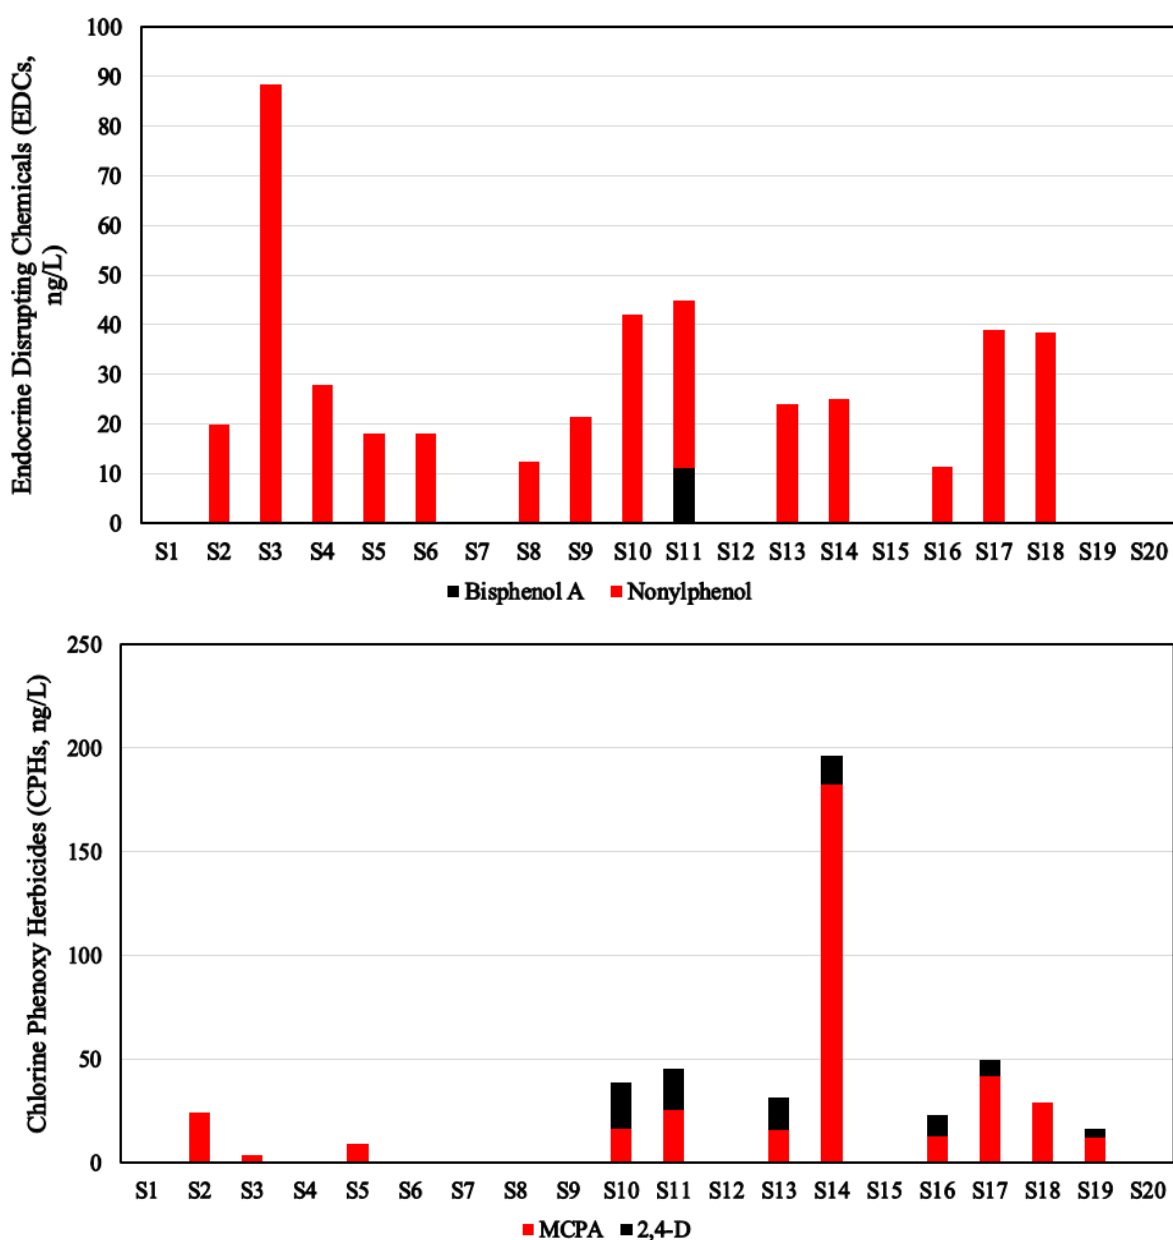

Supplementary Figure S5. Variations in endocrine disrupting chemicals and chlorine phenoxy herbicides of surface water in different sites of Geum River

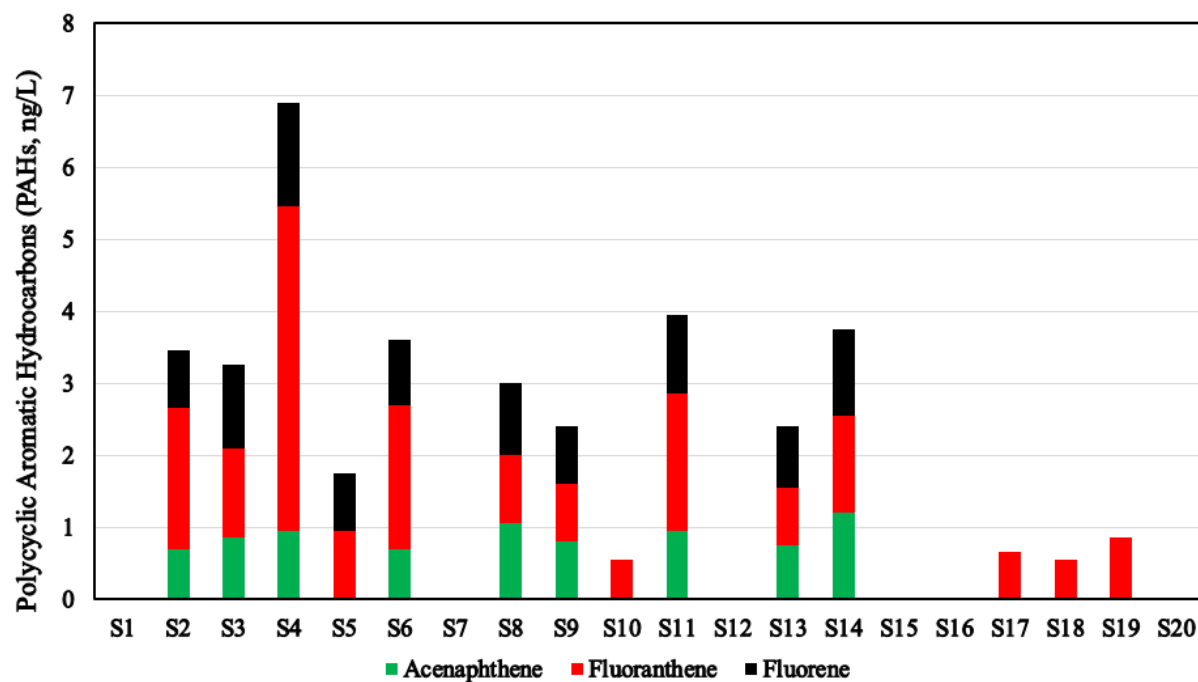

Supplementary Figure S6. Variations in polycyclic aromatic hydrocarbons of surface water in different sites of Geum River

**Supplementary Table S1.** Conditions for the GC analysis of organic phosphorous and organic chlorine pesticides, oxyfluorfen, and PAHs.

| Conditions |                                                        |
|------------|--------------------------------------------------------|
| GC         | . Column . HP-5MS (60 m×0.25 mm×0.25 μm)               |
|            | . Carrier gas . He (99.999%)                           |
|            | . Injection port temp. . 310°C                         |
|            | . Injection mode . pulsed splitless , 1 μℓ injection   |
|            | . Oven temp. 20°C/min 5°C/min                          |
|            | programming . 70°C (1min) → 180°C(2min) → 310°C(10min) |

**Supplementary Table S2.** Conditions for PCB GC-ECD analysis.

| Conditions |                                                      |
|------------|------------------------------------------------------|
| GC         | . Column . HP-5MS (30 m×0.25 mm×0.25 μm)             |
|            | . Carrier gas . N2 (99.999%)                         |
|            | . Injection port temp. . 260°C                       |
|            | . Injection mode . pulsed splitless , 1 μℓ injection |
|            | . Oven temp. 15°C/min 5°C/min                        |
|            | programming . 70°C (2min) → 120°C → 300°C(10min)     |
| ECD        | . Interface temp . 300°C                             |

Supplementary Table S3. ICP/MS specifications for metal analysis

| Parameters                   | Conditions |
|------------------------------|------------|
| Plasma/RF                    |            |
| - Forward power (W)          | 1550       |
| - Interface Temp. (°C)       | 35.06      |
| - Cooling Water Flow (L/min) | 3.82       |
| Cool Gas Flow (L/min)        | 13.978     |
| Auxilliary Gas Flow (L/min)  | 0.7918     |
| Nebulizer Gas Flow (L/min)   | 0.8575     |
| Pump Speed (rpm)             | 40         |

Supplementary Table S4: Fish species name with tolerance and trophic guilds (TS: tolerant species, IS: intermediate species, SS: sensitive species, O: omnivores, I: insectivores, C: carnivores, and H: herbivores)

| Fish name                         | Tolerance Guild | Trophic Guild |
|-----------------------------------|-----------------|---------------|
| <i>Abbottina rivularis</i>        | TS              | O             |
| <i>Acanthorhodeus chankaensis</i> | IS              | O             |
| <i>Acheilognathus koreensis</i>   | IS              | O             |
| <i>Acheilognathus lanceolata</i>  | IS              | O             |
| <i>Acheilognathus macropterus</i> | IS              | O             |
| <i>Acheilognathus rhombeus</i>    | IS              | O             |
| <i>Acheilognathus yamatsutae</i>  | IS              | O             |
| <i>Carassius auratus</i>          | TS              | O             |
| <i>Carassius cuvieri</i>          | TS              | O             |
| <i>Channa argus</i>               | TS              | C             |
| <i>Cobitis choii</i>              | SS              | I             |
| <i>Cobitis nalbanti</i>           | IS              | I             |
| <i>Coreoleuciscus splendidus</i>  | SS              | I             |
| <i>Coreoperca herzi</i>           | SS              | C             |
| <i>Cyprinus carpio</i>            | TS              | O             |

|                                            |    |   |
|--------------------------------------------|----|---|
| <i>Erythroculter erythropterus</i>         | TS | C |
| <i>Gnathopogon strigatus</i>               | IS | I |
| <i>Gobiobotia brevibarba</i>               | SS | I |
| <i>Gobiobotia macrocephala</i>             | SS | I |
| <i>Gobiobotia nakdongensis</i>             | SS | I |
| <i>Hemibarbus labeo</i>                    | TS | I |
| <i>Hemibarbus longirostris</i>             | IS | I |
| <i>Hemiculter eigenmanni</i>               | TS | O |
| <i>Hypomesus nipponensis</i>               | IS | I |
| <i>Iksookimia koreensis</i>                | IS | I |
| <i>Leiocassis ussuriensis</i>              | IS | I |
| <i>Lepomis macrochirus</i>                 | TS | I |
| <i>Liobagrus mediadiposalis</i>            | SS | I |
| <i>Liobagrus obesus</i>                    | SS | I |
| <i>Macropodus ocellatus</i>                | TS | I |
| <i>Microphysogobio jeoni</i>               | IS | I |
| <i>Microphysogobio yaluensis</i>           | IS | O |
| <i>Micropterus salmoides</i>               | TS | C |
| <i>Misgurnus anguillicaudatus</i>          | TS | O |
| <i>Misgurnus mizolepis</i>                 | TS | O |
| <i>Mugil cephalus</i>                      | TS | H |
| <i>Odontobutis interrupta</i>              | IS | C |
| <i>Odontobutis platycephala</i>            | SS | C |
| <i>Opsariichthys uncirostris amurensis</i> | TS | C |
| <i>Oryzias latipes</i>                     | TS | O |
| <i>Oryzias sinensis</i>                    | TS | O |
| <i>Plecoglossus altivelis</i>              | IS | H |
| <i>Pseudobagrus fulvidraco</i>             | TS | I |
| <i>Pseudobagrus koreanus</i>               | SS | I |
| <i>Pseudogobio esocinus</i>                | IS | I |
| <i>Pseudopungtungia nigra</i>              | SS | I |
| <i>Pseudorasbora parva</i>                 | TS | O |
| <i>Pungtungia herzi</i>                    | IS | I |
| <i>Rhinogobius brunneus</i>                | IS | I |
| <i>Rhinogobius giurinus</i>                | TS | O |
| <i>Rhodeus notatus</i>                     | IS | O |
| <i>Rhodeus ocellatus</i>                   | IS | O |
| <i>Rhodeus uyekii</i>                      | IS | C |
| <i>Rhynchocypris oxycephalus</i>           | SS | I |
| <i>Sarcocheilichthys nigripinnis</i>       | IS | I |
| <i>Sarcocheilichthys variegatus</i>        | SS | I |

|                                        |    |   |
|----------------------------------------|----|---|
| <i>Silurus asotus</i>                  | TS | C |
| <i>Siniperca scherzeri</i>             | SS | C |
| <i>Squalidus chankaensis tsuchigae</i> | IS | O |
| <i>Squalidus gracilis majimae</i>      | SS | I |
| <i>Squalidus japonicus coreanus</i>    | TS | O |
| <i>Squaliobarbus curriculus</i>        | IS | O |
| <i>Tridentiger brevispinis</i>         | IS | I |
| <i>Tridentiger obscurus</i>            | TS | I |
| <i>Zacco koreanus</i>                  | SS | I |
| <i>Zacco platypus</i>                  | TS | O |
| <i>Zacco temminckii</i>                | SS | I |

Supplementary Table S5. Metal Concentration at different sites of the whole body of *Zacco platypus*. (Cr: Chromium, Cu: Copper, Zn: Zinc, As: Arsenic, Se: Selenium, Cd: Cadmium, Hg: Mercury, Pb: Lead)

| Fish name             | Sites | Cr    | Cu   | Zn    | As   | Se   | Cd   | Hg   | Pb   |
|-----------------------|-------|-------|------|-------|------|------|------|------|------|
| <i>Zacco platypus</i> | S1    | 2.08  | 1.79 | 70.48 | 0.17 | 0.33 | 0.03 | 0.03 | 0.14 |
|                       | S2    | 0.88  | 1.41 | 33.44 | 0.18 | 0.26 | 0.02 | 0.03 | 0.07 |
|                       | S3    | 2.53  | 1.41 | 35.20 | 0.22 | 0.23 | 0.15 | 0.02 | 0.45 |
|                       | S4    | 0.26  | 0.92 | 25.02 | 0.44 | 0.09 | 0.02 | 0.01 | 0.07 |
|                       | S5    | 0.56  | 1.05 | 29.02 | 0.32 | 0.11 | 0.01 | 0.02 | 0.19 |
|                       | S6    | 1.32  | 1.74 | 39.75 | 0.73 | 0.32 | 0.04 | 0.02 | 1.47 |
|                       | S7    | 5.03  | 1.50 | 58.71 | 0.34 | 0.40 | 0.03 | 0.03 | 0.11 |
|                       | S8    | 0.31  | 1.57 | 32.59 | 0.37 | 0.36 | 0.01 | 0.01 | 0.41 |
|                       | S9    | 8.30  | 3.72 | 50.74 | 0.21 | 0.37 | 0.06 | 0.02 | 0.84 |
|                       | S10   | 2.83  | 1.54 | 45.87 | 0.32 | 0.28 | 0.02 | 0.02 | 0.40 |
|                       | S11   | 6.83  | 3.61 | 50.92 | 0.39 | 0.35 | 0.03 | 0.11 | 1.27 |
|                       | S12   | 4.27  | 2.30 | 52.24 | 3.89 | 0.36 | 0.18 | 0.02 | 2.54 |
|                       | S13   | 10.00 | 2.25 | 56.08 | 0.72 | 0.37 | 0.08 | 0.01 | 1.70 |
|                       | S15   | 3.31  | 1.10 | 41.57 | 0.41 | 0.37 | 0.01 | 0.01 | 0.21 |
|                       | S16   | 8.01  | 1.78 | 39.66 | 0.82 | 0.34 | 0.04 | 0.03 | 0.91 |
|                       | S17   | 1.77  | 1.18 | 30.70 | 0.18 | 0.37 | 0.01 | 0.01 | 0.08 |
|                       | S18   | 6.58  | 1.52 | 42.94 | 0.40 | 0.36 | 0.02 | 0.02 | 0.25 |
|                       | S19   | 10.16 | 1.20 | 29.67 | 0.17 | 0.19 | 0.01 | 0.02 | 0.07 |
|                       | S20   | 4.11  | 1.58 | 35.13 | 0.10 | 0.29 | 0.08 | 0.04 | 0.09 |
